# Supplementary material
Source: publisher figshare collection journal article supplement (https://tandf.figshare.com/articles/dataset/_/5620546)
Supplement: Supplementary file 1 [file 1]

**Table S1:** Absolute frequencies of haplotype distribution in each sampled locality and GenBank accession numbers of COI haplotypes for *Ruditapes decussatus*. Populations are labelled as in Table 1. Asterisks (\*) identify samples with sequences were taken from the GenBank database: Cordero et al. (2014). The template (§) identifies samples with sequences taken from the GenBank database: Keskin & Atar (2013). Due to the loss of haplotype B4 along with its informative polymorphisms (Cordero et al. 2014) (see the methods section for more details), the Aegean individuals previously attributed to the haplotype B4 by Cordero et al. (2014) fall within the haplotype B1 in the present study. Note that in order to analyse the same COI fragment obtained in this study, we used just a portion of the sequences whose GenBank accession numbers are reported in this table. See the main text (Statistical analysis in the Materials and Methods section) for more details. The localities are labelled as in Table I.

|                 | OL | PA | PQ | TR | ST | CA | MU | SP | SG | LO | DN | TH | TL | EBR* | MME* | MG | VEN* | SFX* | HAL* | IZM* | MAR <sup>§</sup> | RF | FOR* | MLF* | MUG* | LUL* | GMO* | Tot      | GB #     |
|-----------------|----|----|----|----|----|----|----|----|----|----|----|----|----|------|------|----|------|------|------|------|------------------|----|------|------|------|------|------|----------|----------|
| A1*             | 27 | 19 | 20 | 31 | 24 | 19 | 28 | 15 | 19 | 16 | 22 | 18 | 5  | 19   | 28   | 18 | 22   | 27   | 8    | 3    |                  | 7  | 28   | 17   | 27   | 33   | 26   | 527      | JX051518 |
| A2*             | 1  | 1  |    | 1  | 3  | 1  |    |    |    | 2  |    |    |    | 1    | 2    |    | 5    |      | 4    |      |                  |    |      |      |      |      |      | 21       | JX051519 |
| A3*             |    |    |    |    |    |    |    |    |    |    |    |    |    |      |      |    |      |      |      |      |                  |    |      | 4    |      |      |      | 4        | JX051520 |
| A4*             |    |    |    |    |    |    |    | 1  |    |    |    |    | 1  |      | 2    |    | 1    |      |      |      |                  | 1  | 1    |      |      |      |      | 7        | JX051521 |
| A5*             | 2  |    |    |    | 1  |    | 1  |    |    |    |    |    |    |      |      |    |      | 3    |      |      |                  |    |      |      |      |      |      | 7        | JX051522 |
| A6*             |    |    |    |    |    |    |    |    |    |    |    |    |    |      |      |    |      |      |      |      |                  |    |      |      |      | 2    | 2    | JX051523 |          |
| A7*             |    |    |    | 1  |    |    |    |    |    | 1  |    | 1  |    | 2    |      |    |      |      |      |      |                  |    |      |      |      |      |      | 5        | JX051524 |
| A8*             |    |    |    |    |    |    |    |    |    |    |    |    |    |      |      |    |      |      |      |      |                  | 1  | 2    |      |      |      |      | 3        | JX051525 |
| A9*             |    |    |    |    |    |    |    |    |    |    | 1  |    |    |      |      |    |      |      |      |      |                  |    |      |      |      | 1    | 2    | JX051526 |          |
| A10*            |    |    |    |    |    |    |    |    |    |    |    |    |    |      |      |    |      |      |      |      |                  |    |      |      |      | 1    | 1    | JX051527 |          |
| A11*            |    |    |    |    |    |    |    |    |    |    |    |    |    |      |      |    |      |      |      |      |                  |    |      |      |      | 1    | 1    | JX051528 |          |
| A12*            |    |    |    |    |    |    |    |    |    |    |    |    |    |      |      |    |      |      |      |      |                  |    |      |      |      | 1    | 1    | JX051529 |          |
| A13*            |    |    |    |    |    |    |    |    |    |    |    |    |    |      |      |    |      |      |      |      |                  |    |      | 1    |      |      | 1    | JX051530 |          |
| A15*            |    |    |    |    |    |    |    |    |    |    |    |    |    |      |      |    |      |      |      |      |                  |    | 1    |      |      |      |      | 1        | JX051532 |
| A16*            |    |    |    |    |    |    |    | 2  | 1  |    |    | 2  |    |      | 1    |    |      |      |      |      |                  |    |      |      |      |      |      | 6        | JX051533 |
| A17*            |    |    |    |    |    |    |    |    |    |    |    |    |    |      |      |    |      | 1    |      |      |                  |    |      |      |      |      |      | 1        | JX051534 |
| A18*            |    |    |    | 3  | 1  |    |    | 1  |    | 1  | 1  | 2  |    |      |      | 1  | 1    |      |      |      |                  |    |      |      |      |      |      | 11       | JX051535 |
| A19*            |    |    |    |    |    |    |    |    |    |    |    |    |    |      |      |    | 1    |      |      |      |                  |    |      |      |      |      |      | 1        | JX051536 |
| A20*            |    |    |    |    |    |    |    |    |    |    |    |    |    |      |      |    | 1    |      |      |      |                  |    |      |      |      |      |      | 1        | JX051537 |
| A21*            |    |    |    |    |    |    |    |    |    |    |    |    |    |      |      |    | 1    |      |      |      |                  |    |      |      |      |      |      | 1        | JX051538 |
| A22             | 5  |    |    |    |    |    |    |    |    |    |    |    |    |      |      |    |      |      |      |      |                  |    |      |      |      |      |      | 5        | KU557025 |
| A23             | 1  |    |    |    |    |    |    |    |    |    |    |    |    |      |      |    |      |      |      |      |                  |    |      |      |      |      |      | 1        | KU557026 |
| A24             | 1  |    |    |    |    |    |    |    |    |    | 1  | 1  |    |      |      |    |      |      |      |      |                  |    |      |      |      |      |      | 3        | KU557027 |
| A25             | 1  |    |    |    |    |    |    |    |    |    |    |    |    |      |      |    |      |      |      |      |                  |    |      |      |      |      |      | 1        | KU557028 |
| A26             | 1  |    |    |    |    |    |    | 1  |    |    |    |    |    |      |      |    |      |      |      |      |                  |    |      |      |      |      |      | 2        | KU557029 |
| A27             | 3  |    | 2  |    |    |    |    |    |    | 1  |    |    |    |      |      | 1  |      |      |      |      |                  |    |      |      |      |      |      | 7        | KU557030 |
| A28             | 1  |    | 1  |    |    |    |    |    |    |    |    |    |    |      |      |    |      |      |      |      |                  |    |      |      |      |      |      | 2        | KU557031 |
| A29             | 1  |    |    |    |    |    |    |    |    |    |    |    |    |      |      |    |      |      |      |      |                  |    |      |      |      |      |      | 1        | KU557032 |
| A30             |    | 1  |    |    |    |    |    |    |    |    |    |    |    |      |      |    |      |      |      |      |                  |    |      |      |      |      |      | 1        | KU557033 |
| A31             |    | 1  |    |    |    |    |    |    |    |    |    |    |    |      |      |    |      |      |      |      |                  |    |      |      |      |      |      | 1        | KU557034 |
| A32             |    |    | 1  |    |    |    |    |    |    | 1  |    |    |    |      |      |    |      |      |      |      |                  |    |      |      |      |      |      | 2        | KU557035 |
| A33             |    |    |    |    |    |    |    |    |    | 1  |    |    |    |      |      |    |      |      |      |      |                  |    |      |      |      |      |      | 1        | KU557036 |
| A34             |    |    |    |    |    | 1  |    |    |    |    |    |    |    |      |      |    |      |      |      |      |                  |    |      |      |      |      |      | 1        | KU557037 |
| A35             |    |    |    |    |    |    |    |    |    |    |    |    |    |      |      | 1  |      |      |      |      |                  |    |      |      |      |      |      | 1        | KU557038 |
| A36             |    |    |    |    |    |    |    |    |    |    |    |    |    |      |      |    |      |      |      |      |                  | 1  |      |      |      |      |      | 1        | KU557039 |
| A37             |    |    |    |    |    |    |    |    |    |    |    |    |    |      |      |    |      |      |      |      |                  | 1  |      |      |      |      |      | 1        | KU557040 |
| A38             |    |    |    |    |    |    |    |    |    |    |    |    |    |      |      |    |      |      |      |      |                  | 1  |      |      |      |      |      | 1        | KU557041 |
| A39             |    |    |    |    |    |    |    |    |    |    |    | 1  |    |      |      |    |      |      |      |      |                  |    |      |      |      |      |      | 1        | KU557042 |
| A40             |    |    |    |    |    |    |    |    |    |    |    | 1  |    |      |      |    |      |      |      |      |                  |    |      |      |      |      |      | 1        | KU557043 |
| A41             |    |    |    | 1  |    |    |    |    |    |    |    |    |    |      |      |    |      |      |      |      |                  |    |      |      |      |      |      | 1        | KU557044 |
| A42             |    |    |    |    | 1  |    |    |    |    |    |    |    |    |      |      |    |      |      |      |      |                  |    |      |      |      |      |      | 1        | KX981455 |
| B1*             |    |    |    |    |    |    |    |    |    |    |    |    |    |      |      |    |      |      | 7    | 19   |                  |    |      |      |      |      |      | 26       | JX051539 |
| B2*             |    |    |    | 1  |    |    |    |    |    |    |    |    |    |      |      |    |      |      | 13   | 1    |                  |    |      |      |      |      |      | 15       | JX051540 |
| B3*             |    |    |    |    |    |    |    |    |    |    |    |    |    |      |      |    |      |      |      | 3    |                  |    |      |      |      |      |      | 3        | JX051541 |
| B5*             |    |    |    |    |    |    |    |    |    |    |    |    |    |      |      |    |      |      |      | 2    |                  |    |      |      |      |      |      | 2        | JX051543 |
| B6*             |    |    |    |    |    |    |    |    |    |    |    |    |    |      |      |    |      |      | 1    |      |                  |    |      |      |      |      |      | 1        | JX051544 |
| B7*             |    |    |    |    |    |    |    |    |    |    |    |    |    |      |      |    |      |      |      | 1    |                  |    |      |      |      |      |      | 1        | JX051545 |
| B8*             |    |    |    |    |    |    |    |    |    |    |    |    |    |      |      |    |      |      |      | 1    |                  |    |      |      |      |      |      | 1        | JX051546 |
| C1 <sup>§</sup> |    |    |    |    |    |    |    |    |    |    |    |    |    |      |      |    |      |      |      |      | 23               |    |      |      |      |      |      | 23       | KC311418 |
| Tot             | 44 | 22 | 24 | 38 | 30 | 21 | 29 | 20 | 20 | 23 | 25 | 26 | 6  | 22   | 33   | 21 | 32   | 31   | 33   | 30   | 23               | 12 | 32   | 17   | 32   | 33   | 32   | 711      |          |

**Table S2:** Pairwise  $\Phi_{ST}$  values between *Ruditapes decussatus* populations. Significance was assessed by a permutation test with 10,000 replicates. The  $\Phi_{ST}$  values that were significant after correction for multiple testing ( $p < 0.0001$  alpha-level after Bonferroni correction) are reported in bold.

Asterisks (\*) identify samples with sequences from the GenBank database: Cordero et al. (2014). The template (§) identifies samples with sequences from the GenBank database: Keskin & Atar (2013). The localities are labelled as in Table I.

|                  | OL             | RF             | TH             | TR             | MU             | SP             | SG             | DN             | GMO*           | MUG*           | LUL*           | MLF*           | FOR*           | MME*           | EBR*           | PA             | PQ             | CA             | LO             | MG             | ST             | TL             | MAR <sup>§</sup> | IZM*          | HAL*         | SFX*         | VEN*  |
|------------------|----------------|----------------|----------------|----------------|----------------|----------------|----------------|----------------|----------------|----------------|----------------|----------------|----------------|----------------|----------------|----------------|----------------|----------------|----------------|----------------|----------------|----------------|------------------|---------------|--------------|--------------|-------|
| OL               | 0.00000        |                |                |                |                |                |                |                |                |                |                |                |                |                |                |                |                |                |                |                |                |                |                  |               |              |              |       |
| RF               | 0.04941        | 0.00000        |                |                |                |                |                |                |                |                |                |                |                |                |                |                |                |                |                |                |                |                |                  |               |              |              |       |
| TH               | 0.05183        | 0.00479        | 0.00000        |                |                |                |                |                |                |                |                |                |                |                |                |                |                |                |                |                |                |                |                  |               |              |              |       |
| TR               | 0.05685        | 0.01700        | 0.00199        | 0.00000        |                |                |                |                |                |                |                |                |                |                |                |                |                |                |                |                |                |                |                  |               |              |              |       |
| MU               | 0.06267        | 0.06402        | 0.02445        | 0.01286        | 0.00000        |                |                |                |                |                |                |                |                |                |                |                |                |                |                |                |                |                |                  |               |              |              |       |
| SP               | 0.05380        | 0.01123        | -0.03258       | 0.01318        | 0.05256        | 0.00000        |                |                |                |                |                |                |                |                |                |                |                |                |                |                |                |                |                  |               |              |              |       |
| SG               | 0.04500        | 0.02091        | -0.02263       | 0.00182        | 0.01211        | -0.02595       | 0.00000        |                |                |                |                |                |                |                |                |                |                |                |                |                |                |                |                  |               |              |              |       |
| DN               | 0.05588        | 0.03342        | 0.00273        | -0.00489       | 0.00339        | 0.02797        | 0.00193        | 0.00000        |                |                |                |                |                |                |                |                |                |                |                |                |                |                |                  |               |              |              |       |
| GMO*             | 0.06526        | 0.03316        | 0.02364        | 0.01429        | 0.00620        | 0.03883        | 0.00431        | -0.00333       | 0.00000        |                |                |                |                |                |                |                |                |                |                |                |                |                |                  |               |              |              |       |
| MUG*             | 0.08023        | 0.06067        | 0.04035        | 0.03384        | 0.06003        | 0.06122        | 0.04027        | 0.04321        | 0.04185        | 0.00000        |                |                |                |                |                |                |                |                |                |                |                |                |                  |               |              |              |       |
| LUL*             | 0.07587        | 0.09320        | 0.03221        | 0.01701        | 0.00453        | 0.06834        | 0.02625        | 0.01120        | 0.01105        | 0.07940        | 0.00000        |                |                |                |                |                |                |                |                |                |                |                |                  |               |              |              |       |
| MLF*             | 0.04276        | <b>0.02831</b> | 0.00003        | -0.00759       | -0.01995       | 0.02295        | -0.00843       | -0.01648       | -0.01393       | 0.04055        | 0.00000        | 0.00000        |                |                |                |                |                |                |                |                |                |                |                  |               |              |              |       |
| FOR*             | 0.06818        | 0.01338        | 0.02375        | 0.01901        | 0.01042        | 0.04200        | 0.01090        | 0.00812        | 0.01263        | 0.05006        | 0.01629        | -0.00982       | 0.00000        |                |                |                |                |                |                |                |                |                |                  |               |              |              |       |
| MME              | 0.05569        | 0.01595        | -0.00029       | 0.00867        | 0.01088        | 0.00009        | -0.01770       | 0.00789        | 0.01384        | 0.04194        | 0.01582        | -0.00988       | 0.00605        | 0.00000        |                |                |                |                |                |                |                |                |                  |               |              |              |       |
| EBR*             | 0.05368        | 0.03462        | 0.00965        | -0.00046       | 0.03436        | 0.03850        | 0.01677        | 0.01737        | 0.01656        | 0.05511        | 0.05640        | 0.01578        | 0.02564        | 0.00432        | 0.00000        |                |                |                |                |                |                |                |                  |               |              |              |       |
| PA               | 0.02623        | 0.01633        | 0.00420        | -0.01133       | 0.00888        | 0.01945        | 0.00012        | -0.00903       | 0.00661        | 0.03634        | 0.01811        | -0.01299       | 0.01100        | -0.00305       | 0.00098        | 0.00000        |                |                |                |                |                |                |                  |               |              |              |       |
| PQ               | -0.00507       | 0.04920        | 0.04353        | 0.03844        | 0.08918        | 0.05858        | 0.05424        | 0.06386        | 0.06212        | 0.09195        | 0.11360        | 0.06204        | 0.07318        | 0.05014        | 0.05933        | 0.02748        | 0.00000        |                |                |                |                |                |                  |               |              |              |       |
| CA               | 0.04732        | 0.02936        | 0.01117        | -0.00335       | 0.00711        | 0.03062        | 0.00134        | -0.00042       | 0.00193        | 0.04387        | 0.02243        | -0.01047       | 0.00697        | -0.01289       | -0.00036       | -0.01437       | 0.05279        | 0.00000        |                |                |                |                |                  |               |              |              |       |
| LO               | 0.01113        | 0.01832        | 0.01124        | -0.00419       | 0.03007        | 0.02696        | 0.01378        | 0.01135        | 0.02355        | 0.04771        | 0.04164        | 0.00535        | 0.02908        | 0.00595        | -0.00834       | -0.01433       | -0.01746       | -0.00336       | 0.00000        |                |                |                |                  |               |              |              |       |
| MG               | -0.01054       | 0.02052        | -0.00264       | 0.00649        | 0.04156        | 0.00225        | -0.00099       | 0.01763        | 0.02936        | 0.05554        | 0.05727        | 0.01556        | 0.03623        | 0.01843        | 0.03126        | -0.00561       | -0.02168       | 0.02296        | -0.01761       | 0.00000        |                |                |                  |               |              |              |       |
| ST               | 0.05365        | 0.03905        | 0.02277        | -0.00582       | 0.01791        | 0.04072        | 0.01840        | 0.01103        | 0.02256        | 0.05328        | 0.03738        | 0.00600        | 0.02850        | -0.00321       | 0.00443        | -0.01161       | 0.05149        | -0.01418       | -0.00756       | 0.03036        | 0.00000        |                |                  |               |              |              |       |
| TL               | 0.00297        | -0.07832       | -0.05434       | -0.03423       | 0.14271        | -0.04528       | 0.00703        | 0.02420        | -0.00141       | 0.04957        | 0.34132        | 0.19176        | -0.00808       | -0.05770       | 0.03188        | -0.01706       | 0.02472        | 0.03965        | -0.02301       | -0.01683       | 0.00971        | 0.00000        |                  |               |              |              |       |
| MAR <sup>§</sup> | <b>0.82267</b> | <b>0.90127</b> | <b>0.84232</b> | <b>0.84934</b> | <b>0.98731</b> | <b>0.88104</b> | <b>0.95476</b> | <b>0.96010</b> | <b>0.93263</b> | <b>0.94705</b> | <b>1.00000</b> | <b>1.00000</b> | <b>0.95431</b> | <b>0.92330</b> | <b>0.95891</b> | <b>0.93122</b> | <b>0.91711</b> | <b>0.97071</b> | <b>0.89843</b> | <b>0.90645</b> | <b>0.93199</b> | <b>0.98004</b> | 0.000            |               |              |              |       |
| IZM*             | <b>0.82752</b> | <b>0.79279</b> | <b>0.80297</b> | <b>0.81868</b> | <b>0.86172</b> | <b>0.80323</b> | <b>0.82945</b> | <b>0.84362</b> | <b>0.84959</b> | <b>0.85544</b> | <b>0.87309</b> | <b>0.83478</b> | <b>0.85775</b> | <b>0.84857</b> | <b>0.83808</b> | <b>0.82798</b> | <b>0.83049</b> | <b>0.83857</b> | <b>0.82065</b> | <b>0.81586</b> | <b>0.84466</b> | <b>0.78629</b> | <b>0.894</b>     | 0.0000        |              |              |       |
| HAL*             | <b>0.57433</b> | 0.47085        | <b>0.51021</b> | <b>0.53471</b> | <b>0.57254</b> | <b>0.49506</b> | <b>0.51903</b> | <b>0.54468</b> | <b>0.56786</b> | <b>0.57541</b> | <b>0.59167</b> | <b>0.51572</b> | <b>0.57716</b> | <b>0.56895</b> | <b>0.53485</b> | <b>0.52375</b> | <b>0.53584</b> | <b>0.53142</b> | <b>0.52155</b> | <b>0.50971</b> | <b>0.55587</b> | 0.43149        | <b>0.699</b>     | 0.1563        | 0.000        |              |       |
| SFX*             | 0.06185        | 0.05485        | 0.03325        | 0.02553        | -0.00264       | 0.05479        | 0.02673        | 0.02636        | 0.02677        | 0.06545        | 0.05342        | 0.01917        | 0.03399        | 0.02941        | 0.04215        | 0.02379        | 0.08338        | 0.02693        | 0.03822        | 0.04594        | 0.02185        | 0.04786        | <b>0.955</b>     | <b>0.8562</b> | <b>0.573</b> | 0.000        |       |
| VEN*             | 0.06362        | 0.03477        | 0.03436        | 0.01223        | 0.04960        | 0.04617        | 0.03430        | 0.03371        | 0.04274        | 0.06560        | 0.06011        | 0.02546        | 0.04519        | 0.00534        | 0.01746        | 0.00529        | 0.05288        | 0.00436        | 0.00058        | 0.04228        | -0.00970       | -0.01641       | <b>0.890</b>     | <b>0.8380</b> | <b>0.560</b> | <b>0.057</b> | 0.000 |

**Table S3:** Pairwise  $\Phi_{ST}$  values between Bayesian groups (R1, R2, R3, R4, and R5). Significance was assessed by a permutation test with 10,000 replicates. The  $\Phi_{ST}$  values that were significant after correction for multiple testing ( $p < 0.0001$  alpha-level after Bonferroni correction) are reported in bold.

|    | R1            | R2            | R3            | R4            | R5     |
|----|---------------|---------------|---------------|---------------|--------|
| R1 | 0.0000        |               |               |               |        |
| R2 | <b>0.2283</b> | 0.0000        |               |               |        |
| R3 | <b>0.9940</b> | <b>0.5591</b> | 0.0000        |               |        |
| R4 | <b>0.9988</b> | <b>0.6359</b> | <b>0.9623</b> | 0.0000        |        |
| R5 | <b>0.9923</b> | <b>0.8334</b> | <b>0.9229</b> | <b>0.9583</b> | 0.0000 |
